# Supplementary material for: De novo Biosynthesis of Vindoline and Catharanthine in Saccharomyces cerevisiae
Source: Research Square preprint supplement (doi:10.21203/rs.3.rs-2061869/v1), 2022-09-19
Supplement: Supplementary file 1 [file 1f04fd4fa8e3ab74c9d8d266.xlsx]

## Sheet: Figure 2C
		Repeat 1	Repeat 2	Repeat 3	Mean	SD
	CAT2	230.644	205.727	239.458	225.276	17.4942
	CAT3	535.109	519.213	526.819	527.047	7.95072
	CAT4	358.879	371.612	348.272	359.588	11.6859
	CAT5	302.069	302.476	278.135	294.227	13.9374
	CAT6	304.6	299.151	306.07	303.274	3.64523
	CAT7	281.717	329.143	334.749	315.203	29.1349
	CAT8	425.403	418.939	422.181	422.174	3.23222
	CAT9	488.447	532.12	444.773	488.447	61.7635
	CAT10	311.225	302.515	295.285	303.008	7.98182

## Sheet: Figure 2D
		Repeat 1	Repeat 2	Repeat 3	Mean	SD
	TAB3	8.52067	9.45596	8.90466	8.96043	0.47014
	TAB4	19.9137	16.6718	17.4184	18.0013	1.69773
	TAB5	6.6313	4.53248	6.43678	5.86685	1.15968
	TAB6	10.0444	9.07072	13.807	10.974	2.50123
	TAB7	3.94747	5.58984	4.83967	4.79233	0.8222
	TAB8	10.3347	12.5269	10.6645	11.1754	1.18203
	TAB9	7.76039	7.2127	8.37983	7.78431	0.58393
	TAB10	17.247	21.4241	18.0135	18.8949	2.22369
	TAB11A	14.6751	16.6027	15.2743	15.5174	0.98654

## Sheet: Figure 3B
	Time (h)	Repeat 1	Repeat 2	Repeat 3	Mean	SD
	24	11.7374	10.3608	13.811	11.9697	1.7368
	48	16.8576	17.9344	13.4265	16.0728	2.35419
	72	18.5545	15.3392	14.2343	16.0427	2.24435
	96	14.6743	13.4048	15.3816	14.4869	1.00164
	120	11.9708	10.342	10.8438	11.0522	0.83418

## Sheet: Figure 4
		Repeat 1	Repeat 2	Repeat 3	Mean	SD
	VIN3	15.9719	15.4062	16.7987	16.059	0.70033
	VIN5	23.4705	20.4995	15.7528	19.9076	3.89275
	VIN7	55.4103	67.7043	50.4617	57.8588	8.87826
	VIN8	71.9426	73.525	66.6341	70.7006	3.60943
	VIN10	148.998	149.876	148.95	149.275	0.52127
	VIN11	101.98	123.186	129.539	118.235	14.431
